# Supplementary material
Source: publisher figshare collection journal article supplement (https://wiley.figshare.com/ndownloader/files/5618769)
Supplement: Supplementary file 1 [file 5618769]

Ecological Archives E092-091-A1


### *Ecological Archives* E092-091-A1

### **Janeene M. Touchton and James N. M. Smith. 2011. Species loss, delayed numerical responses, and functional compensation in an antbird guild. *Ecology* 92:1126–1136.**

Appendix A. A figure of metabolically corrected biomass/100 ha of the antbird clinger guild during census years on Barro Colorado Island (BCI) and in Soberania National Park (SNP), Panama.

|  |
| --- |
|  |
|  |
| FIG. A1. Metabolically corrected biomass/100 ha of ocellated (Oc), bicolored (Bi), and spotted (Si), antbirds during census years both on Barro Colorado Island (BCI; filled symbols) and in Soberania National Park (SNP; open symbols). Census data in addition to those from this study were provided by: (Karr 1971, Willis 1974, Brawn et al. 1995, Robinson 2001, and Styrsky 2003). Estimates from this study for bicolored and ocellated antbirds show mean values with 95% confidence intervals. |

  

LITERATURE CITED

Brawn, J. D., J. R. Karr, and J. D. Nichols. 1995. Demography of birds in a neotropical forest: Effects of allometry, taxonomy, and ecology. Ecology 76:41–51.

Karr, J. R. 1971. Structure of avian communities in selected Panama and Illinois habitats. Ecological Monographs 41:207–233.

Robinson, W. D. 2001. Changes in abundance of birds in a Neotropical forest fragment over 25 years: a review. Animal Biodiversity and Conservation 24:51–65.

Styrsky, J. N. 2003. Life-history evolution and population dynamics of a Neotropical forest bird (*Hylophylax naevioides*). PhD Dissertation. University of Illinois, Urbana-Champaign.

Willis, E. O. 1974. Populations and local extinctions of birds on Barro Colorado Island, Panama. Ecological Monographs 44:153–169.

---


[Back to E092-091]
